## **Genome-wide variation in DNA methylation linked to developmental stage and chromosomal suppression of recombination in white-throated sparrows**

Dan Sun<sup>1,2</sup>, Thomas S. Layman<sup>1</sup>, Hyeonsoo Jeong<sup>1</sup>, Paramita Chatterjee<sup>1</sup>, Kathleen Grogan<sup>3,4</sup>, Jennifer Merritt<sup>3</sup>, Donna L. Maney<sup>3</sup>, Soojin V. Yi<sup>1\*</sup>

<sup>1</sup>School of Biological Sciences, Institute for Bioengineering and Bioscience, Georgia Institute of Technology, Atlanta, GA 30332

<sup>2</sup>Department of Epigenetics and Molecular Carcinogenesis, The University of Texas MD Anderson Cancer Center, Smithville, TX 78957

<sup>3</sup>Department of Psychology, Emory University, Atlanta, GA 30322

<sup>4</sup>Current address: Departments of Anthropology & Biology, University of Cincinnati, Cincinnati, OH 45221

\*Correspondence

Soojin V. Yi

School of Biological Sciences

Institute for Bioengineering and Bioscience

Georgia Institute of Technology, Atlanta, GA 30332

404-385-6084

**Running title:** Epigenetic variation in white-throated sparrows

- 1 **Keywords:** DNA methylation, recombination, gene expression, epigenetic reprogramming,
- 2 transposable elements
- 3

4

5

## ABSTRACT

6 DNA methylation is known to play critical roles in key biological processes. Most of our  
7 knowledge on regulatory impacts of DNA methylation has come from laboratory-bred model  
8 organisms, which may not exhibit the full extent of variation found in wild populations. Here,  
9 we investigated naturally-occurring variation in DNA methylation in a wild avian species, the  
10 white-throated sparrow (*Zonotrichia albicollis*). This species offers exceptional opportunities  
11 for studying the link between genetic differentiation and phenotypic traits because of a non-  
12 recombining chromosome pair linked to both plumage and behavioral phenotypes. Using  
13 novel single-nucleotide resolution methylation maps and gene expression data, we show  
14 that DNA methylation and the expression of DNA methyltransferases are significantly higher  
15 in adults than in nestlings. Genes for which DNA methylation varied between nestlings and  
16 adults were implicated in development and cell differentiation and were located throughout  
17 the genome. In contrast, differential methylation between plumage morphs was localized to  
18 the non-recombining chromosome pair. One subset of CpGs on the non-recombining  
19 chromosome was extremely hypomethylated and localized to transposable elements.  
20 Changes in methylation predicted changes in gene expression for both chromosomes. In  
21 summary, we demonstrate changes in genome-wide DNA methylation that are associated  
22 with development and with specific functional categories of genes in white-throated  
23 sparrows. Moreover, we observe substantial DNA methylation reprogramming associated  
24 with the suppression of recombination, with implications for genome integrity and gene  
25 expression divergence. These results offer an unprecedented view of ongoing epigenetic  
26 reprogramming in a wild population.

27

28

## INTRODUCTION

29 DNA methylation is a key epigenetic mark that adds another layer of information to the  
30 genomic DNA (1). The best-known effect of DNA methylation, which has been observed  
31 most often in mammalian studies, is the repression of transcription resulting from  
32 methylation at CpG sites in *cis*-regulatory regions (2). The role of DNA methylation in other  
33 genomic regions is less well understood, although there are examples linking DNA  
34 methylation of gene bodies and intergenic regions to regulation of gene expression (3-5).  
35 DNA methylation in non-genic regions has been implicated in many regulatory processes,  
36 including maintenance of genome stability and silencing transposable elements (TEs) (6-9).  
37 DNA methylation is also known to associate with development and aging (10-14).

38       Most of our knowledge about DNA methylation comes from studies of humans and  
39 laboratory mice. Little is currently known about how DNA methylation varies and how it  
40 impacts gene expression in natural populations. In this study, we provide rare insight into  
41 how DNA methylation varies in a wild species of songbird. We used deep whole-genome  
42 bisulfite sequencing (WGBS) to generate single-nucleotide-resolution maps of DNA  
43 methylation in a wild passerine, the white-throated sparrow (*Zonotrichia albicollis*). This  
44 species is an exceptional non-model vertebrate system for understanding links between the  
45 evolution of genomes and complex behavioral phenotypes (15-17). Two naturally occurring  
46 plumage morphs, white-striped (WS) and tan-striped (TS), are completely linked to a  
47 supergene that segregates with an aggressive phenotype in both sexes. Birds of the WS  
48 morph, which are heterozygous for a rearranged second chromosome (ZAL2<sup>m</sup>), are on  
49 average more aggressive than birds of the TS morph (18,19), which are homozygous for the  
50 standard arrangement (ZAL2) (20-22). In addition, WS birds invest less in parenting  
51 behavior than do TS birds (18,19,23-27). Thus, the supergene is associated with a complex  
52 phenotype involving both aggression and parenting.

53           This unique chromosomal polymorphism is maintained in the population through  
54 disassortative mating; that is, nearly all mating pairs consist of one TS and one WS  
55 individual (15,21,22). As a consequence, the ZAL2<sup>m</sup> chromosome is nearly always in a state  
56 of heterozygosity, experiencing little recombination. Cessation of recombination causes  
57 several genetic changes, including reduction of gene expression, accumulation of  
58 transposable elements, and ultimately, genetic degeneration of the non-recombining region  
59 (28,29). The ZAL2 and ZAL2<sup>m</sup> chromosomes are in an early stage of genetic differentiation,  
60 having accumulated approximately 1% nucleotide divergence (15,16,20). The ZAL2<sup>m</sup>  
61 chromosome has yet to exhibit signs of substantial genetic degeneration (i.e., only a handful  
62 of genes have become pseudogenized, (16)). Despite this modest genetic divergence,  
63 genes on the non-recombining ZAL2<sup>m</sup> chromosome exhibit reduced expression, and ZAL2  
64 appears to have evolved incipient dosage compensation, indicating rapid regulatory  
65 evolution preceding large-scale genetic differences between the ZAL2 and ZAL2<sup>m</sup>  
66 chromosomes (16). Our novel whole genome DNA methylation maps offer a unique  
67 opportunity to investigate how DNA methylation changes in the early stage of chromosomal  
68 differentiation following the cessation of recombination.

69           We investigated patterns of DNA methylation in 12 samples of brain tissue from  
70 female white-throated sparrows of both morphs. These samples were taken from seven  
71 adults (four WS and three TS) and five nestlings (three WS and two TS), thus spanning two  
72 developmental time points. Our novel and comprehensive data on nucleotide-resolution  
73 whole-genome methylation maps reveal previously unknown epigenetic variation in a wild  
74 avian species. We find substantial variation in DNA methylation between developmental  
75 stages and plumage morphs. By integrating this dataset with novel gene expression data  
76 taken from the same individuals, as well as an open chromatin map of a WS bird, we  
77 demonstrate that variation in DNA methylation between nestlings and adults is widespread  
78 across the genome and correlated with variation in expression of developmental genes.

79 Furthermore, by identifying allele-specific methylation and its potential evolutionary origins,  
80 we provide a rare glimpse into epigenetic reprogramming of a chromosome following a  
81 recent cessation of recombination.

82

83

## MATERIALS AND METHODS

### 84 ***Sample collection***

85 For WGBS and RNA-seq experiments, we collected 12 female birds (seven breeding adults  
86 and five nestlings) for our analysis (Supplementary Table 1). Adults were collected using  
87 mist nets at our field site near Argyle, Maine, USA, as previously described (18,27).  
88 Nestlings were collected from nests at day 7 post-hatch (30). Only one nestling per nest was  
89 used for the analysis. The hypothalamus was micro-dissected from each brain as previously  
90 described (27). For the ATAC-seq experiment, the hypothalamus was micro-dissected from  
91 a non-breeding WS male adult bird (sample ID: ID 17031) collected at our field site in  
92 Atlanta, Georgia, USA (31). We performed the kinship analysis using KING (32). The kinship  
93 coefficients between the 12 individuals in this study were all practically zero (the maximum  
94 kinship coefficient was 0.00277), indicating that they were not closely related.

95

### 96 ***Whole genome sequencing***

97 Whole genome sequencing libraries were generated from DNA extracted from the white-  
98 throated sparrow livers using a QIAGEN DNeasy Blood and Tissue DNA kit. For each  
99 sample, 500ng-1µg of DNA was extracted and sheared on a Covaris ultrasonicator to 200-  
100 600bp at the Emory Integrated Genomics Core. The DNA fragment ends were repaired, and  
101 A-overhangs were added before Nextera barcode adaptors were ligated to the DNA  
102 fragments overnight. Finally, the libraries were PCR-amplified to increase concentration and  
103 enrich for adaptor-ligated DNA fragments. WGS libraries were sequenced using Illumina  
104 HiSeq X Ten with 150 x 2 bp paired-end reads at Macrogen Clinical Laboratory.

105

### 106 ***SNP calling and identification of fixed differences***

107 To identify SNPs occupying CpG sites, we first removed adaptor sequences and low-quality  
108 bases from the sequencing reads using the parameters “-q 30 -O 1 -m 50 --trim-n --pair-filter  
109 any” using cutadapt 1.18 (33). Trimmed reads were then aligned to the TS reference  
110 genome using Bowtie2 v2.3.4.2 (34) with the --very-sensitive-local option, and the alignment  
111 rate was ~95% per sample. Technical duplicates were then discarded by Picard Tools 2.19.0  
112 (<https://broadinstitute.github.io/picard/>). SNP calling was conducted on clean and aligned  
113 reads using GATK 4.0 (35-37). Specifically, SNPs were called using Haplotypecaller with the  
114 -ERC GVCF option, and joint genotyping of all samples was performed with the  
115 GenotypeGVCF. Finally, SNPs with MAF < 0.05, meanDP < 5 and meanDP > 80 were  
116 discarded using VCFtools 0.1.15 (38).

117 With the final set of SNPs, we identified putatively fixed differences between ZAL2  
118 and ZAL2<sup>m</sup> using the same procedure as described by Sun et al. (2018). For further  
119 alignment of WGBS, ATAC-seq, and RNA-seq data, to minimize potential mapping bias  
120 towards the reference genome (ZAL2/ZAL2) caused by differences between ZAL2 and  
121 ZAL2<sup>m</sup>, we constructed a genome with putatively fixed differences masked by *N*'s in the  
122 reference (*N*-masked genome).

123

### 124 ***Whole genome bisulfite sequencing***

125 WGBS libraries were prepared using a custom protocol. First, DNA was extracted from the  
126 hypothalamus samples using a QIAGEN DNeasy Blood and Tissue DNA kit. For each  
127 sample, 100 ng - 1 µg of DNA was pooled with 1-5% lambda phage DNA to test for bisulfite  
128 conversion efficiency. The DNA samples were then sheared on a Covaris ultrasonicator to  
129 200-600bp. The DNA fragment ends were repaired, and A-overhangs were added before  
130 bisulfite compatible adaptors were ligated to the DNA fragments overnight. Then, the DNA

131 fragments were bisulfite-converted and PCR-amplified to increase concentration and enrich  
132 for adaptor-ligated DNA fragments. WGBS libraries were then sequenced using Illumina  
133 HiSeq X Ten at Macrogen Clinical Laboratory. At least ~100 million 150 bp x 2 raw reads  
134 were generated per sample (Supplemental Table 1).

135

### 136 ***Analysis of whole genome bisulfite sequencing data***

137 WGBS reads were trimmed as described above. The trimmed reads were aligned to the *N*-  
138 masked reference genome with parameters “--bowtie2 -X 1000” using Bismark v0.20.0 (39).  
139 The average mapping efficiency of samples was ~70% for all samples (Supplemental Table  
140 1). Third, duplicated reads and non-bisulfite-converted reads were discarded by  
141 *deduplicate\_bismark* (parameter: -p) and *filter\_non\_conversion* (parameter:  
142 percentage\_cutoff 20), respectively. Last, *bismark\_methylation\_extractor* was run to extract  
143 CpG methylation calls. To obtain bisulfite conversion rates, raw reads were aligned to the  
144 phage lambda genome using Bismark (same parameters). Because lambda DNA is not  
145 methylated and therefore should be completely bisulfite-converted, the percentage of  
146 methylated cytosines of lambda DNA was taken as the non-conversion rate. Bisulfite  
147 conversion rates were above 99.8% in all samples (Supplemental Table 1).

148 To call allele-specific methylation values, SNPsplit 0.3.4 (40) was run with  
149 parameters “--bisulfite --paired” using fixed differences between ZAL2 and ZAL2<sup>m</sup>. Then,  
150 *bismark\_methylation\_extractor* was run for allele-separated reads. For WS birds, consistent  
151 with the genotype (ZAL2/ZAL2<sup>m</sup>), the percentage of reads assigned to each chromosome  
152 was ~4 - 4.5% (Supplemental Table 1); for TS birds, the percentage of reads assigned to  
153 ZAL2 was ~8 - 9% but to ZAL2<sup>m</sup> 0 - 0.01% (Supplemental Table 1), which was consistent  
154 with the genotype (ZAL2 / ZAL2). After this procedure, the median sequencing depths were  
155 at least 9 reads per sample and 4 per allele (Supplemental Table 1). Only CpG sites with at  
156 least five reads aligned were retained for further analysis (e.g., (41)). Finally, because

157 cytosine polymorphisms could hamper accurate calling of methylation, we excluded any  
158 CpGs in the reference genome that were polymorphic within the sequenced samples.

159

### 160 ***ATAC-seq library preparation, sequencing, data pre-processing, and peak calling***

161 For one sample (hypothalamus of a WS male, ID 17031), 10,000 - 200,000 cells were  
162 homogenized in EMEM (Eagle's Minimum Essential Medium) and phosphate-buffered  
163 saline. The cells were pelleted in a centrifuge and re-suspended in a lysis buffer made of  
164 non-ionic detergent (made in-house from Tris, NaCl, MgCl<sub>2</sub>, and IGEPAL CA-630). After cell  
165 lysis, nuclei were isolated by centrifugation and added to a tagmentation reaction mix  
166 (Illumina Nextera DNA Library Prep Kit, Cat#: FC-121-1030). During tagmentation, the  
167 sequencing adapters were inserted into accessible chromatin regions by Tn5 transposase.  
168 Adapter-tagmented fragments were purified (Invitrogen Agencourt AMPure XP beads, Cat#:  
169 A63880), bar-coded (Illumina Nextera Index Kit, cat#: FC-121-1011), and amplified (Fisher  
170 KAPA HiFi HotStart Kit, Cat#: NC0295239). The ATAC-seq libraries were then sequenced  
171 using a MiSeq sequencer (Illumina; Reagent Kit v3) with 150 cycles (75 bp paired-end  
172 reads) in the Molecular Evolution Core at Georgia Tech.

173 We aligned the trimmed ATAC-seq reads (trimming was performed as above) to the  
174 *N*-masked reference genome using Bowtie2 v2.3.4.2 (parameters: -X 2000 --no-mixed --no-  
175 discordant) (34), which allowed a maximal insert size of 2 Kb between paired reads, and  
176 discarded unmapped or discordant alignments. The mapping efficiency for this sample was  
177 82.13%. The aligned reads were then deduplicated using markdup of SAMtools 1.7 (42). As  
178 a result, we obtained 23 million clean mapped reads. To identify ZAL2 and ZAL2<sup>m</sup>-specific  
179 ATAC-seq peaks, we followed the strategy proposed in (43). Specifically, we first called  
180 peaks in the overall sample using MACS2 version 2.1.1.20160309 (44) with '-g 1.1e+9 -f  
181 BAMPE -p 0.05 -B --SPMR --nomodel' options. We next assigned reads to ZAL2 and ZAL2<sup>m</sup>  
182 using SNPsplit 0.3.4 (40) with parameters "--paired" using fixed differences between ZAL2



183 and ZAL2<sup>m</sup>. The number of ZAL2 and ZAL2<sup>m</sup> reads mapped to the ATAC-seq peaks were  
184 counted using Bedtools v2.28.0 (45), and the differences in allelic read counts were tested  
185 by a two-tailed binomial test. Peaks with FDR-corrected  $P < 0.05$  were denoted as allele-  
186 specific.

187

### 188 ***RNA-seq library preparation, sequencing, data processing, and analysis of differential*** 189 ***expression***

190 RNA extraction and library preparation of the female samples were performed as previously  
191 described (27). The libraries were then sequenced on the HiSeq 4000 at 150 bp paired-end  
192 reads to ~40 million reads per sample. RNA-seq raw reads were trimmed as above and then  
193 aligned to the *N*-masked genome by HISAT2 2.1.0 (46). Secondary alignments were filtered  
194 by SAMtools 1.7 (42) to ensure that only primary alignments were retained. SNPsplit 0.3.4  
195 (40) was run to assign reads to ZAL2 or ZAL2<sup>m</sup> for the WS samples. Expression levels (raw  
196 read counts) were then quantified by StringTie v1.3.4d (47). To identify genes that were  
197 differentially expressed between ZAL2 and ZAL2<sup>m</sup>, we normalized libraries with the size  
198 factors generated in the morph comparison step and identified differential expression with  
199 'design = ~ age + allele' (age as the adjusted covariate) using the DESeq2 1.22.2 package  
200 (48) in R 3.5 (49).

201

### 202 ***Analysis of differential DNA methylation***

203 Differentially methylated CpGs between age groups and morphs (or alleles) were detected  
204 by DSS 2.30.1 (50) under the default setting, with one variable as the 'independent' variable  
205 and the other as 'adjusted' covariate. CpGs with FDR-corrected  $P$ -values less than 0.05 and  
206 absolute values of differences in methylation greater than 10% were defined as DMCs.  
207 Bedtools v2.28.0 (45) was run to assign DMCs to different gene features. If a DMC was  
208 within multiple gene features, we prioritized the assignment in the following order: upstream

209 (10 Kb upstream of TSSs), exons, introns, downstream (10 Kb downstream of TESs), TEs  
210 and intergenic regions. After quality control, a total of 3,880,473 CpGs were used to identify  
211 age-DMCs and morph-DMCs, and 317,499 CpGs were used to identify allele-DMCs.

212

### 213 ***Principal component analysis***

214 We stored DNA methylation data generated from all samples as a methylrawDB object using  
215 methylkit 1.9.4 (51). The object was then converted into a percent methylation matrix, with  
216 only CpG sites with more than five reads in all samples retained. PCA analysis was  
217 performed using the PCASamples function in methylkit (parameter: obj.return = T). The  
218 returned prcomp result was used to plot sample clusters with the autoplot function in  
219 ggfortify 0.4.5 (52).

220

### 221 ***Transposable element annotation***

222 We adopted both *de novo* and homology-based approaches to annotate repetitive  
223 sequences in the reference genome. First, *de novo* discovery of TEs was performed by  
224 RepeatModeler 1.0.9 (53). The generated library was merged with the avian Repbase library  
225 (20181026 version), which was used to annotate TEs in the reference genome using  
226 RepeatMasker 4.0.9 (parameters: -xsmall -s -nolow -norna -nocut) (54).

227

### 228 ***Cross-species whole genome alignment and comparison of DNA methylation***

229 We examined cross-species alignment to identify CpGs specific to ZAL2 and ZAL2<sup>m</sup>. We  
230 aligned the sparrow reference genome to the zebra finch (*Taeniopygia\_guttata*-3.2.4) and  
231 great tit (*Parus\_major*1.1) reference genomes using minimap2-2.16 (parameters: --  
232 secondary=no -c) (55). Only alignments for which we were confident, defined by the highest  
233 mapping score (MAPQ=60), were retained. The pafutils liftover program of minimap2 was  
234 then run to find dinucleotides in the great tit genome that were orthologous to CpG sites in

235 the sparrow genome. Note that chromosome number in white-throated sparrows follows the  
236 conventional nomenclature for avian chromosomes, numbering them from largest to  
237 smallest (56). Chromosome 2 in white-throated sparrows corresponds to chromosome 3 in  
238 chicken (20). The inter-species alignments were consistent with the homology between  
239 Chromosome 3 in zebrafish-ZAL2 in white-throated sparrows. In addition, Using the brain  
240 methylation data from the great tit compiled by Sun et al. (57), we obtained fractional  
241 methylation levels for shared CpGs in the other two species (sparrow-tit: 436 CpGs).

242

243

## RESULTS

### 244 ***Contrasting effects of developmental stage and morphs on genome-wide DNA*** 245 ***methylation maps***

246 We examined patterns of DNA methylation and gene expression in samples of  
247 hypothalamus, a brain region known to take part in many social and developmental traits.  
248 Our experimental cohort included birds of both morphs in two age groups: adults aged more  
249 than one year (7 WS, 5 TS) and nestlings at post-hatch day seven (3 WS, 2 TS). To remove  
250 the effect of sex in a cost-effective manner, in the current study only female birds are  
251 analysed for whole genome DNA methylation. We investigated the effects of morph and  
252 developmental stage (also referred to as 'age' in this manuscript) on genome-wide DNA  
253 methylation maps. These white-throated sparrows were not related based on the kinship  
254 coefficient analysis (32). Specifically, using all SNPs we detected in this study, the maximum  
255 kinship coefficient was 0.00277 (Materials and Methods).

256 Whole genome bisulfite sequencing maps of the samples were generated (see  
257 Methods). Bisulfite conversion rates, determined from spiked-in unmethylated lambda phage  
258 DNA, were all 99.8%. We generated on average 431 million reads of 150 bps for WS birds,  
259 and 134 million reads for TS birds. Greater coverage for the heterozygous WS birds was  
260 necessary to recover sufficient reads for both ZAL2 and ZAL2<sup>m</sup> chromosomes. After

261 removing duplicates, we mapped the reads to an *N*-masked reference genome to avoid  
262 mapping bias due to the polymorphisms between ZAL2/ZAL2<sup>m</sup> chromosomes. Following  
263 these procedures, WS birds and TS birds had on average 33.4X and 13X coverage,  
264 respectively, per CpG (Supplementary Table 1). We aimed for higher depth for the WS birds  
265 so that we can separate ZAL2 and ZAL2<sup>m</sup> chromosomes for later analyses.

266 To first gain an understanding of genome-wide variation in DNA methylation, we  
267 performed a principal component analysis (PCA) of all mapped CpGs prior to separating the  
268 ZAL2 and ZAL2<sup>m</sup> alleles (**Figure 1A**). The first principal component (PC1), which  
269 distinguished adults from nestlings, accounted for the largest amount of variation in DNA  
270 methylation (~20%). The second principal component (PC2) separated the TS and WS  
271 morphs and explained ~11% of the variation among samples. We then performed the same  
272 analyses using only CpGs within the rearranged portion of the ZAL2/ZAL2<sup>m</sup> chromosome  
273 (**Figure 1B**), which produced highly similar results. Consequently, age and morph were  
274 determined to be the top two factors of variation in DNA methylation in our data.

275 Using the same whole-genome CpG data, we identified significantly differentially  
276 methylated CpGs (herein referred to as '**DMCs**') between adults and nestlings, as well as  
277 between WS and TS birds, using a method designed specifically for the WGBS analysis  
278 (50). This method explicitly accounts for the characteristics of next-generation sequencing  
279 data and allows us to identify sites that are affected by different co-variables. In addition to  
280 correcting for multiple testing using the FDR method (FDR-adjusted  $P < 0.05$ ), we restricted  
281 the value of the absolute methylation difference to be equal to or greater than 10%.  
282 Following these procedures, we identified 286,434 DMCs between adults and nestlings  
283 (referred to as 'age-DMCs'), and 4,507 DMCs between TS and WS birds (referred to as  
284 'morph-DMCs').

285 Age-DMCs and morph-DMCs were distinct from each other with respect to both the  
286 chromosomal distribution and the effect sizes (**Figure 1C** and **1D**). In terms of the

287 chromosomal distribution, age-DMCs were distributed across the genome, but depleted from  
288 the Z chromosome. In comparison, morph-DMCs were largely restricted to the ZAL2/ZAL2<sup>m</sup>  
289 chromosomes (**Figure 1C**), indicating that nearly all differences in DNA methylation between  
290 the morphs were due to CpGs on the non-recombining chromosomal pair. The effect sizes,  
291 measured as absolute differences in DNA methylation between the two morphs, were on  
292 average substantially greater than for the age-DMCs (**Figure 1D**).

293

### 294 ***Global hypermethylation of CpGs in adults relative to nestlings***

295 Interestingly, most age-DMCs (97.7% of all age-DMCs) were more highly methylated (hyper-  
296 methylated) in adults than in nestlings (**Figure 2A**). We examined the expression levels of  
297 DNA methyltransferases (DNMTs) in RNA-seq data of the same individuals. Consistent with  
298 the observed genome-wide hypermethylation of samples from adults, DNA  
299 methyltransferases DNMT1 and DNMT3b had significantly higher expression in adults than  
300 in nestlings (**Figure 2B**; note that DNMT3a is not annotated in the reference genome due to  
301 the poor assembly quality around that region). Genes harboring age-DMCs in promoters  
302 were significantly enriched for gene ontology (GO) terms related to development and cell  
303 differentiation (**Figure 2C**).

304 We identified a total of 6806 genes that were differentially expressed between  
305 nestlings and adults using FDR-adjusted  $P < 0.05$ , demonstrating that gene expression  
306 profiles change dramatically between the two developmental stages. Among these genes, a  
307 slightly greater number was more highly expressed in adults than in nestlings (3485 adult-  
308 biased versus 3321 nestling-biased). In contrast, genes harboring age-DMCs in promoters  
309 tended to be more highly expressed in nestlings, and this trend increased as the number of  
310 age-DMCs in each promoter increased (**Figure 2D**). These observations suggest that  
311 hypermethylation of promoter CpGs might contribute to the down-regulation of early  
312 developmental genes in adults. This model is further supported by the observation that

313 several developmental genes harbored DMCs in promoters and showed reduced expression  
314 in adults compared to nestlings (**Figure 2E**).

315

316 ***Differential methylation of the ZAL2 and ZAL2<sup>m</sup> chromosomes is driven by substantial***  
317 ***hypomethylation of CpGs on the non-recombining ZAL2<sup>m</sup>***

318 Because the effects of morph on DNA methylation were nearly exclusive to the ZAL2/ZAL2<sup>m</sup>  
319 chromosomes, we next investigated DNA methylation patterns of these two chromosomes  
320 more deeply. To do so, we used WGBS data from WS individuals and separated the ZAL2  
321 and ZAL2<sup>m</sup> alleles (see Methods). We then used the Dispersion Shrinkage for Sequencing  
322 data (DSS) package, v.2.30.1 (50) to detect CpGs that were differentially methylated  
323 between ZAL2 and ZAL2<sup>m</sup> (referred to as ‘allele-DMCs’). We identified 13,773 allele-DMCs  
324 using the same criteria we used in the genome-wide analysis (FDR-adjusted  $P < 0.05$ ,  
325 absolute methylation difference  $> 10\%$ ).

326 To examine the degree and direction of differences in DNA methylation between  
327 ZAL2 and ZAL2<sup>m</sup>, we first plotted the sizes of these differences (level of ZAL2<sup>m</sup> methylation –  
328 ZAL2 level of methylation) in a histogram (**Figure 3A**). Their distribution revealed that allele-  
329 DMCs tended to be less methylated (also referred to as ‘hypomethylated’) on ZAL2<sup>m</sup> than on  
330 ZAL2 (**Figure 3A**). We identified three distinct groups of allele-DMCs. Approximately 75% of  
331 allele-DMCs showed a difference in DNA methylation between -0.5 to 0.5, i.e. a less than  
332 50% difference in DNA methylation between ZAL2 and ZAL2<sup>m</sup> (light blue and red, **Figure**  
333 **3A**). These allele-DMCs were equally likely to be more methylated on either ZAL2 or ZAL2<sup>m</sup>  
334 (depicted as ‘ZAL2<sup>m</sup> < ZAL2’ and ‘ZAL2<sup>m</sup> > ZAL2’ in **Figure 3A**, respectively). Interestingly,  
335 the remaining 25% of allele-DMCs showed extremely differential DNA methylation, with  
336 ZAL2<sup>m</sup> alleles exhibiting markedly lower DNA methylation than their ZAL2 counterparts  
337 (depicted as ‘ZAL2<sup>m</sup> << ZAL2’, dark blue, in **Figure 3A**). We will refer to these three  
338 categories of allele-DMCs as ‘ZAL2<sup>m</sup> hypomethylated’ (ZAL2<sup>m</sup> < ZAL2, light blue in **Figure**

339 **3A**), 'ZAL2<sup>m</sup> hypermethylated' (ZAL2<sup>m</sup> > ZAL2, red in **Figure 3A**), and 'ZAL2<sup>m</sup> extremely  
340 hypomethylated' (ZAL2<sup>m</sup> << ZAL2, dark blue in **Figure 3A**) in the remainder of the paper.

341

342 To understand the evolutionary changes in DNA methylation leading to the three distinctive  
343 categories of allele-DMCs, we compared levels of DNA methylation in these three categories  
344 of CpGs, as well as those that did not exhibit differential DNA methylation, with  
345 corresponding levels of DNA methylation in a passerine outgroup, the great tit (58). This  
346 comparison revealed that CpGs that were not differentially methylated between the ZAL2  
347 and ZAL2<sup>m</sup> chromosomes showed similar methylation levels in the white-throated sparrow  
348 and great tit, suggesting that they have maintained similar levels of DNA methylation through  
349 evolutionary time (**Figure 3B**, gray columns). In comparison, ZAL2<sup>m</sup> extremely  
350 hypomethylated (ZAL2<sup>m</sup> << ZAL2) DMCs bore a clear signature of hypomethylation on the  
351 ZAL2<sup>m</sup> since the split from the great tit (**Figure 3B**). This pattern contrasts clearly with that of  
352 other allele-DMCs, which exhibited signs of both increased and decreased DNA methylation  
353 compared with great tit (**Figure 3B**, light blue and red). Together these observations indicate  
354 that although both ZAL2 and ZAL2<sup>m</sup> have undergone changes in DNA methylation since the  
355 divergence from the great tit, a number of CpGs on ZAL2<sup>m</sup> have experienced a strong  
356 reduction in DNA methylation since the split of the ZAL2 and ZAL2<sup>m</sup> chromosomes.

357 We then tested whether allele-DMCs are enriched in specific functional regions.  
358 While the occurrence of other allele-DMCs was similar to all CpGs, ZAL2<sup>m</sup> extremely  
359 hypomethylated allele-DMCs were five-fold enriched in TEs ( $P < 2.2 \times 10^{-16}$  using a  
360 proportion test, **Figure 3C**). They were also slightly enriched in intronic regions, while slightly  
361 (yet significantly) depleted in regions upstream of transcription start sites (TSSs) where CpG  
362 islands are typically located (e.g., (59), **Figure 3C**). Currently, TEs in white-throated sparrow  
363 are poorly annotated. We used a *de novo* annotation (see Methods) and identified  
364 subfamilies of TEs (we could not identify individual TEs with confidence due to low



365 mappability). At the subfamily level, we observed higher expression of TEs on ZAL2<sup>m</sup> than  
366 ZAL2 ( $P < 0.01$ , paired Mann–Whitney  $U$  test), which suggested potentially higher TE activity  
367 on ZAL2<sup>m</sup>. We also observed that TEs were more hypomethylated on ZAL2<sup>m</sup> than ZAL2, and  
368 that this pattern was driven by ZAL2<sup>m</sup> extremely hypomethylated DMCs (**Figure 3D**). Given  
369 that these effects were estimated at the TE subfamily level, more data are necessary to  
370 show a direct link between methylation of TEs and their insertion activity in the ZAL2<sup>m</sup>  
371 chromosome.

372

### 373 ***Potential regulatory consequences of ZAL2 and ZAL2<sup>m</sup>-specific DNA methylation***

374 One of the best-known impacts of differential DNA methylation, when it occurs in promoters,  
375 is silencing of gene expression (2). Therefore, we first examined the expression levels of  
376 genes harboring allele-DMCs in their promoters. We found 325 genes with at least one  
377 allele-DMC in the promoter. For those genes, the divergence of gene expression was  
378 negatively correlated with the divergence of DNA methylation in the promoter (**Figure 4A**).  
379 This relationship was consistent with the aforementioned idea that promoter methylation  
380 dampens gene expression, although the degree of correlation was relatively weak (but  
381 significant). As we restricted our gene sets to those including more and more allele-DMCs in  
382 their promoters, the correlation coefficients increased (**Figures 4B-C**). These observations  
383 indicate that divergence in DNA methylation of promoters can explain some of the  
384 divergence in gene expression between ZAL2 and ZAL2<sup>m</sup>.

385         Recent studies have demonstrated that the regulatory impacts of differential DNA  
386 methylation extend far beyond promoters; differential DNA methylation can also cause  
387 differential expression of distant genes (60-63) and differential accessibility of long-range  
388 chromatin (64-67). We thus investigated the relationship between allele-DMCs and  
389 chromatin accessibility. We generated a map of accessible chromatin regions using ATAC-  
390 seq on DNA isolated from the hypothalamus of a white-throated sparrow of the WS morph



391 (ZAL2/ZAL2<sup>m</sup>). We assigned open chromatin peaks to either ZAL2 or ZAL2<sup>m</sup> (see Methods)  
392 and examined the overlap of each peak with allele-DMCs. In the absence of enrichment or  
393 depletion of allele-DMCs in these peaks, the number of ATAC-seq peaks that overlap allele-  
394 DMCs should be proportional simply to the number of CpGs, regardless of their allele-  
395 specific methylation status (Supplementary Table 2). In contrast to this prediction, we found  
396 both statistically significant enrichment and depletion of allele-DMCs within ATAC-seq peaks  
397 (**Figure 4D**, Supplementary Table 2). Only one ZAL2<sup>m</sup> extremely hypomethylated allele-  
398 DMC was located within ATAC-seq peaks on each chromosome, which represents a  
399 significant ( $P = 0.037$ , proportion test) and marginally significant ( $P = 0.058$ ) depletion of  
400 allele-DMCs from this category on ZAL2 and ZAL2<sup>m</sup>, respectively (**Figure 4D**). In contrast,  
401 other categories of allele-DMCs were enriched in allele-specific ATAC-seq peaks.  
402 Specifically, ZAL2<sup>m</sup> hypomethylated allele-DMCs were enriched in ATAC-seq peaks specific  
403 to the ZAL2<sup>m</sup> chromosome, but not in those specific to ZAL2 (**Figure 4D**). ZAL2<sup>m</sup>  
404 hypermethylated allele-DMCs, on the other hand, were enriched in ZAL2 peaks but not in  
405 ZAL2<sup>m</sup> peaks (**Figure 4D**). These observations suggest that differential DNA methylation  
406 between alleles correlates with their differential accessibility.

407

408

## DISCUSSION

409 Naturally occurring morphological and behavioral polymorphisms in white-throated sparrows  
410 offer a tremendous opportunity for studying the links between chromosomal differentiation  
411 and phenotypic traits (15-17). In this work, we present extensive epigenomic and  
412 transcriptomic data from this non-model organism, broadening our perspective on  
413 development and chromosomal evolution. We showed that developmental stages and  
414 plumage morphs are associated with distinct patterns of genome-wide DNA methylation in  
415 this species. The comparison between nestlings and adults revealed significant differences  
416 in DNA methylation that are widespread across the genome, except for the Z chromosome  
417 (**Figure 1C**). As previous studies of DNA methylation across development/aging have

418 typically excluded sex chromosomes (e.g., (68,69), we have yet to understand why age-  
419 DMCs are underrepresented on the Z chromosome. Future studies that include sex  
420 chromosomes would reveal whether our observation is specific to white-throated sparrows  
421 or extends to other taxa.

422 Interestingly, age-DMCs were predominantly hypermethylated in adults (**Figure 2A**),  
423 consistent with the significantly higher expression of DNMTs in adults (**Figure 2B**). Previous  
424 studies have demonstrated widespread hypermethylation in the brains of humans and mice  
425 (12,70). As far as we are aware, however, changes in DNA methylation associated with  
426 aging have not been demonstrated outside of mammalian systems. Our observation of  
427 pronounced hypermethylation in adult brains, compared to nestling brains, in this avian  
428 species suggests that it may represent a shared molecular mechanism between mammals  
429 and birds. Previous studies in mammals have shown that DNA methylation regulates  
430 downstream pathways of neuronal and glial cellular differentiation (71-73), and that  
431 differential DNA methylation between neural cell types is critical for the differentiation of  
432 gene expression between them (41). Results of GO analysis and differential gene  
433 expression suggest that hypermethylation of promoter CpGs in adult brains might contribute  
434 to the down-regulation of early developmental genes (**Figure 2C**).

435 In contrast, morph differences in DNA methylation were nearly exclusive to the  
436 ZAL2/ZAL2<sup>m</sup> chromosomes. We identified nearly 14,000 CpGs that were differentially  
437 methylated, at a relatively stringent cutoff of FDR-corrected  $P < 0.05$ . Utilizing these CpGs  
438 and outgroup data, we observed both hyper- and hypo-methylation of the non-recombining  
439 ZAL2<sup>m</sup> chromosome as well as its counterpart, ZAL2, since their divergence. As DNA  
440 methylation varies strongly with underlying genetic variation in mammals and plants (74-77)  
441 some of the observed epigenetic divergence could have been due to divergence of linked  
442 positions. Most of the CpGs that were differentially methylated between the ZAL2 and ZAL2<sup>m</sup>  
443 chromosomes were equally likely to be more methylated on either ZAL2 or ZAL2<sup>m</sup>. However,

444 we discovered a group of CpGs that show extremely reduced DNA methylation on the  
445 ZAL2<sup>m</sup> chromosome (referred to as 'ZAL2<sup>m</sup> extremely hypomethylated' in the Results). This  
446 group accounted for a quarter of all allele-differentially methylated CpGs (**Figure 3**). Cross-  
447 species comparisons solidified that these CpGs underwent massive hypomethylation on the  
448 non-recombining ZAL2<sup>m</sup> chromosome (**Figure 3B**).

449 Our study was designed to examine CpGs that are conserved on both the ZAL2 and  
450 ZAL2<sup>m</sup> chromosomes, so that we could identify differentially methylated CpGs. It should be  
451 noted that CpGs that are specific to either chromosome might play important roles (17). For  
452 example, CpGs specific to humans are associated with cognitive traits and diseases (78),  
453 and are enriched in regions that are differentially DNA methylated between species (79). We  
454 intend to study the potential impacts of chromosome-specific CpGs in follow-up studies.

455 Experimental studies in human and mouse cell lines have demonstrated that  
456 recombination following double strand breaks can recruit DNA methyltransferases and  
457 increase DNA methylation (80-82). At the genome scale, methylation-associated SNPs and  
458 germline methylation levels are both positively correlated with inferred recombination rates in  
459 humans (83,84). Hypomethylation of the non-recombining chromosome in white-throated  
460 sparrows, ZAL2<sup>m</sup>, fits this broad observation, and supports a potential molecular link  
461 between recombination and DNA methylation. Interestingly, extreme hypomethylation of the  
462 ZAL2<sup>m</sup> chromosome preferentially occurred in TEs (**Figure 3C**). ATAC-seq profiles of ZAL2<sup>m</sup>  
463 extremely hypomethylated CpGs indicate that they tend to occur outside of accessible  
464 chromatin (**Figure 4D**). Hypomethylation is known to activate TEs (85), further increasing TE  
465 insertion (86,87). We showed that at the subfamily level, TEs on ZAL2<sup>m</sup> exhibit higher  
466 expression than those on ZAL2, which is consistent with the effects of hypomethylation on  
467 TE activity (**Figure 3D**). Given that an increase in TE insertion is hypothesized to be one of  
468 the first genomic changes during the evolution of non-recombining chromosomes in  
469 *Drosophila* (88), a similar mechanism may be operating in the ZAL2/ZAL2<sup>m</sup> system,

470 potentially fueled by the extreme hypomethylation. Additional data on TE transcription and a  
471 better-annotated reference genome in this species will be necessary to investigate the  
472 relationship between DNA methylation and TE activity on the ZAL2<sup>m</sup> chromosome.

473 Integrating our gene expression data and chromatin accessibility data, we present  
474 results consistent with regulatory roles of allele-specific DNA methylation. First, when allele-  
475 DMCs were present in the promoter, the degree of differential methylation of those  
476 promoters was correlated with the degree of differential expression of the genes (**Figure 4A-  
477 C**). Second, the landscape of open chromatin on the ZAL2 and ZAL2<sup>m</sup> chromosomes in a  
478 WS bird suggested significant associations between allele-specific hypomethylation and  
479 allele-specific open chromatin peaks (**Figure 4D**). The comparison between ATAC-seq  
480 peaks and DNA methylation should be taken with caution because of a limitation in our data;  
481 the tissue sample used for ATAC-seq was from a non-breeding (winter) male while the adult  
482 WGBS data were from breeding (summer) females. ATAC-seq and WGBS data from the  
483 same birds are currently lacking. A recent study of 66 ATAC-seq maps from 20 different  
484 tissues of male and female mice (89) demonstrated that the majority of accessible regions  
485 between tissues overlapped and that the correlation between male and female tissues was  
486 extremely high. For example, in samples of cerebellum in mice, the correlation in accessible  
487 regions between males and females was 0.96 in (89)). In the present study, the associations  
488 between DNA methylation and chromatin accessibility are consistent with those observed in  
489 model organisms (64-66) and suggest that changes in allele-specific DNA methylation may  
490 correlate with the chromatin landscape. Together, these observations indicate widespread  
491 functional impacts of differential DNA methylation in the genome of this interesting species.

492 In conclusion, our comprehensive epigenetic study in white-throated sparrows has  
493 revealed significant effects of age and plumage morph on DNA methylation landscapes. We  
494 show that effects of age on DNA methylation are pervasive and likely affect regulation of  
495 developmental genes. In contrast, morph differences in DNA methylation are mostly

496 enriched on ZAL2/ZAL2<sup>m</sup>, and involve both hyper- and hypomethylation of the  
497 recombination-suppressed ZAL2<sup>m</sup> as well as its counterpart, ZAL2. On the basis of a  
498 comparison with an outgroup, we also discovered a large number of CpGs for which DNA  
499 methylation has been dramatically reduced specifically on ZAL2<sup>m</sup> chromosome. We propose  
500 that these different varieties of allelic DNA methylation divergence have led to specific  
501 functional consequences. Together, our results not only provide a novel data set from a wild  
502 avian species, but also raise several hypotheses on which we hope future studies will build  
503 to further illuminate the connection between genotype and phenotype and pathways of  
504 chromosome evolution.

505

#### 506 **ACKNOWLEDGEMENTS**

507 This study was funded by an NIH grant (R01MH082833) to DLM and an NSF grant (IOS-  
508 1656247) to DLM and SVY, and by NIH (R01MH103517) and NSF (MCB-1615664) grants to  
509 SVY. We thank Ben Long for comments on the manuscript.

510

511

512

## References

513

- 514 1. Lister, R. and Ecker, J.R. (2009) Finding the fifth base: genome-wide sequencing of  
515 cytosine methylation. *Genome Res*, **19**, 959-966.
- 516 2. Schübeler, D. (2015) Function and information content of DNA methylation. *Nature*,  
517 **517**, 321.
- 518 3. Aran, D., Sabato, S. and Hellman, A. (2013) DNA methylation of distal regulatory  
519 sites characterizes dysregulation of cancer genes. *Genome Biol*, **14**, R21.
- 520 4. Jjingo, D., Conley, A.B., Yi, S.V., Lunyak, V.V. and Jordan, I.K. (2012) On the  
521 presence and role of human gene-body DNA methylation. *Oncotarget*, **3**, 462-474.
- 522 5. Mendizabal, I., Zeng, J., Keller, T.E. and Yi, S.V. (2017) Body-hypomethylated  
523 human genes harbor extensive intragenic transcriptional activity and are prone to  
524 cancer-associated dysregulation. *Nucleic Acids Res*, **45**, 4390-4400.
- 525 6. Robertson, K.D. and A.Jones, P. (2000) DNA methylation: past, present and future  
526 directions. *Carcinogenesis*, **21**, 461-467.
- 527 7. Burns, K.H. (2017) Transposable elements in cancer. *Nat Rev Cancer*, **17**, 415-424.
- 528 8. Jones, P.A. (2012) Functions of DNA methylation: islands, start sites, gene bodies  
529 and beyond. *Nat Rev Genet*, **13**, 484-492.
- 530 9. Deniz, O., Frost, J.M. and Branco, M.R. (2019) Regulation of transposable elements  
531 by DNA modifications. *Nat Rev Genet*, **20**, 417-431.
- 532 10. Lister, R., Mukamel, E.A., Nery, J.R., Urich, M., Puddifoot, C.A., Johnson, N.D.,  
533 Lucero, J., Huang, Y., Dwork, A.J., Schultz, M.D. *et al.* (2013) Global epigenomic  
534 reconfiguration during mammalian brain development. *Science*, **341**, 1237905.
- 535 11. Price, A.J., Collado-Torres, L., Ivanov, N.A., Xia, W., Burke, E.E., Shin, J.H., Tao, R.,  
536 Ma, L., Jia, Y., Hyde, T.M. *et al.* (2019) Divergent neuronal DNA methylation patterns  
537 across human cortical development reveal critical periods and a unique role of CpH  
538 methylation. *Genome Biol*, **20**, 196.
- 539 12. Sun, D. and Yi, S.V. (2015) Impacts of chromatin states and long-range genomic  
540 segments on aging and DNA methylation. *PLoS One*, **10**, e0128517.
- 541 13. Bell, C.G., Lowe, R., Adams, P.D., Baccarelli, A.A., Beck, S., Bell, J.T., Christensen,  
542 B.C., Gladyshev, V.N., Heijmans, B.T., Horvath, S. *et al.* (2019) DNA methylation  
543 aging clocks: challenges and recommendations. *Genome Biol*, **20**, 249.
- 544 14. Horvath, S. (2013) DNA methylation age of human tissues and cell types. *Genome  
545 Biology*, **14**, 3156.
- 546 15. Tuttle, E.M., Bergland, A.O., Korody, M.L., Brewer, M.S., Newhouse, D.J., Minx, P.,  
547 Stager, M., Betuel, A., Cheviron, Z.A., Warren, W.C. *et al.* (2016) Divergence and  
548 functional degradation of a sex chromosome-like supergene. *Curr Biol*, **26**, 344-350.
- 549 16. Sun, D., Huh, I., Zinzow-Kramer, W.M., Maney, D.L. and Yi, S.V. (2018) Rapid  
550 regulatory evolution of a nonrecombining autosome linked to divergent behavioral  
551 phenotypes. *Proceedings of the National Academy of Sciences*, **115**, 2794.
- 552 17. Merritt, J.R., Grogan, K.E., Zinzow-Kramer, W.M., Sun, D., Ortlund, E.A., Yi, S.V.  
553 and Maney, D.L. (2020) A behavioral polymorphism caused by a single gene inside a  
554 supergene. *bioRxiv*, 2020.2001.2013.897637.
- 555 18. Horton, B.M., Hudson, W.H., Ortlund, E.A., Shirk, S., Thomas, J.W., Young, E.R.,  
556 Zinzow-Kramer, W.M. and Maney, D.L. (2014) Estrogen receptor alpha  
557 polymorphism in a species with alternative behavioral phenotypes. *Proceedings of  
558 the National Academy of Sciences*, **111**, 1443-1448.
- 559 19. Kopachena, J.G. and Falls, J.B. (1993) Aggressive performance as a behavioral  
560 correlate of plumage polymorphism in the white-throated sparrow (*Zonotrichia  
561 albicollis*). *Behaviour*, **124**, 249-266.



- 562 20. Thomas, J.W., Caceres, M., Lowman, J.J., Morehouse, C.B., Short, M.E., Baldwin,  
563 E.L., Maney, D.L. and Martin, C.L. (2008) The chromosomal polymorphism linked to  
564 variation in social behavior in the white-throated sparrow (*Zonotrichia albicollis*) is a  
565 complex rearrangement and suppressor of recombination. *Genetics*, **179**, 1455-  
566 1468.
- 567 21. Thorneycroft, H.B. (1975) Cytogenetic study of white-throated sparrow, *Zonotrichia*  
568 *albicollis* (Gmelin). *Evolution*, **29**, 611-621.
- 569 22. Thorneycroft, H.B. (1966) Chromosomal polymorphism in the white-throated  
570 sparrow, *Zonotrichia albicollis* (Gmelin). *Science*, **154**, 1571-1572.
- 571 23. Maney, D.L., Horton, B.M. and Zinzow-Kramer, W.M. (2015) Estrogen receptor alpha  
572 as a mediator of life-history trade-offs. *Integr Comp Biol*, **55**, 323-331.
- 573 24. Tuttle, E.M. (2003) Alternative reproductive strategies in the white-throated sparrow:  
574 behavioral and genetic evidence. *Behav Ecol*, **14**, 425-432.
- 575 25. Horton, B.M., Moore, I.T. and Maney, D.L. (2014) New insights into the hormonal and  
576 behavioural correlates of polymorphism in white-throated sparrows, *Zonotrichia*  
577 *albicollis*. *Anim Behav*, **93**, 207-219.
- 578 26. Maney, D.L. (2008) Endocrine and genomic architecture of life history trade-offs in an  
579 avian model of social behavior. *Gen Comp Endocr*, **157**, 275-282.
- 580 27. Zinzow-Kramer, W.M., Horton, B.M., McKee, C.D., Michaud, J.M., Tharp, G.K.,  
581 Thomas, J.W., Tuttle, E.M., Yi, S. and Maney, D.L. (2015) Genes located in a  
582 chromosomal inversion are correlated with territorial song in white-throated sparrows.  
583 *Genes Brain Behav*, **14**, 641-654.
- 584 28. Charlesworth, B. and Charlesworth, D. (2000) The degeneration of Y chromosomes.  
585 *Philos Trans R Soc Lond B Biol Sci*, **355**, 1563-1572.
- 586 29. Yi, S. and Charlesworth, B. (2000) Contrasting patterns of molecular evolution of  
587 genes on the new and old sex chromosomes of *Drosophila miranda*. *Mol. Biol. Evol.*,  
588 **17**, 703-717.
- 589 30. Grogan, K.E., Horton, B.M., Hu, Y. and Maney, D.L. (2019) A chromosomal inversion  
590 predicts the expression of sex steroid-related genes in a species with alternative  
591 behavioral phenotypes. *Molecular and Cellular Endocrinology*, **495**, 110517.
- 592 31. Merritt, J.R., Davis, M.T., Jalabert, C., Libecap, T.J., Williams, D.R., Soma, K.K. and  
593 Maney, D.L. (2018) Rapid effects of estradiol on aggression depend on genotype in a  
594 species with an estrogen receptor polymorphism. *Hormones and Behavior*, **98**, 210-  
595 218.
- 596 32. Manichaikul, A., Mychaleckyj, J.C., Rich, S.S., Daly, K., Sale, M. and Chen, W.M.  
597 (2010) Robust relationship inference in genome-wide association studies.  
598 *Bioinformatics*, **26**, 2867-2873.
- 599 33. Martin, M. (2011) Cutadapt removes adapter sequences from high-throughput  
600 sequencing reads. *EMBnet.journal*.
- 601 34. Langmead, B. and Salzberg, S.L. (2012) Fast gapped-read alignment with Bowtie 2.  
602 *Nat Methods*, **9**, 357-U354.
- 603 35. McKenna, A., Hanna, M., Banks, E., Sivachenko, A., Cibulskis, K., Kernytsky, A.,  
604 Garimella, K., Altshuler, D., Gabriel, S., Daly, M. *et al.* (2010) The Genome Analysis  
605 Toolkit: a MapReduce framework for analyzing next-generation DNA sequencing  
606 data. *Genome Research*, **20**, 1297-1303.
- 607 36. Van der Auwera, G.A., Carneiro, M.O., Hartl, C., Poplin, R., Del Angel, G., Levy-  
608 Moonshine, A., Jordan, T., Shakir, K., Roazen, D., Thibault, J. *et al.* (2013) From  
609 FastQ data to high confidence variant calls: the Genome Analysis Toolkit best  
610 practices pipeline. *Curr Protoc Bioinformatics*, **43**, 11.10.11-11.10.33.
- 611 37. DePristo, M.A., Banks, E., Poplin, R., Garimella, K.V., Maguire, J.R., Hartl, C.,  
612 Philippakis, A.A., del Angel, G., Rivas, M.A., Hanna, M. *et al.* (2011) A framework for

- 613 variation discovery and genotyping using next-generation DNA sequencing data.  
614 *Nature Genetics*, **43**, 491-498.
- 615 38. Danecek, P., Auton, A., Abecasis, G., Albers, C.A., Banks, E., DePristo, M.A.,  
616 Handsaker, R.E., Lunter, G., Marth, G.T., Sherry, S.T. *et al.* (2011) The variant call  
617 format and VCFtools. *Bioinformatics*, **27**, 2156-2158.
- 618 39. Krueger, F. and Andrews, S.R. (2011) Bismark: a flexible aligner and methylation  
619 caller for Bisulfite-Seq applications. *Bioinformatics*, **27**, 1571-1572.
- 620 40. Krueger, F. and Andrews, S.R. (2016) SNPsplit: allele-specific splitting of alignments  
621 between genomes with known SNP genotypes. *F1000Res*, **5**, 1479.
- 622 41. Mendizabal, I., Berto, S., Usui, N., Toriumi, K., Chatterjee, P., Douglas, C., Huh, I.,  
623 Jeong, H., Layman, T., Tamminga, C.A. *et al.* (2019) Cell type-specific epigenetic  
624 links to schizophrenia risk in the brain. *Genome Biol*, **20**, 135.
- 625 42. Li, H., Handsaker, B., Wysoker, A., Fennell, T., Ruan, J., Homer, N., Marth, G.,  
626 Abecasis, G., Durbin, R. and Proc, G.P.D. (2009) The Sequence Alignment/Map  
627 format and SAMtools. *Bioinformatics*, **25**, 2078-2079.
- 628 43. Jung, Y.H., Kremisky, I., Gold, H.B., Rowley, M.J., Punyawai, K., Buonanotte, A., Lyu,  
629 X., Bixler, B.J., Chan, A.W.S. and Corces, V.G. (2019) Maintenance of CTCF- and  
630 Transcription Factor-Mediated Interactions from the Gametes to the Early Mouse  
631 Embryo. *Molecular Cell*, **75**, 154-171.e155.
- 632 44. Zhang, Y., Liu, T., Meyer, C.A., Eeckhoute, J., Johnson, D.S., Bernstein, B.E.,  
633 Nusbaum, C., Myers, R.M., Brown, M., Li, W. *et al.* (2008) Model-based analysis of  
634 ChIP-Seq (MACS). *Genome Biology*, **9**, R137.
- 635 45. Quinlan, A.R. and Hall, I.M. (2010) BEDTools: a flexible suite of utilities for  
636 comparing genomic features. *Bioinformatics*, **26**, 841-842.
- 637 46. Kim, D., Langmead, B. and Salzberg, S.L. (2015) HISAT: a fast spliced aligner with  
638 low memory requirements. *Nat Methods*, **12**, 357-360.
- 639 47. Pertea, M., Pertea, G.M., Antonescu, C.M., Chang, T.C., Mendell, J.T. and Salzberg,  
640 S.L. (2015) StringTie enables improved reconstruction of a transcriptome from RNA-  
641 seq reads. *Nat Biotechnol*, **33**, 290-+.
- 642 48. Love, M.I., Huber, W. and Anders, S. (2014) Moderated estimation of fold change  
643 and dispersion for RNA-seq data with DESeq2. *Genome Biology*, **15**.
- 644 49. R Core Team. (2019), Vienna, Austria.
- 645 50. Wu, H., Xu, T., Feng, H., Chen, L., Li, B., Yao, B., Qin, Z., Jin, P. and Conneely, K.N.  
646 (2015) Detection of differentially methylated regions from whole-genome bisulfite  
647 sequencing data without replicates. *Nucleic Acids Res*, **43**, e141-e141.
- 648 51. Akalin, A., Kormaksson, M., Li, S., Garrett-Bakelman, F.E., Figueroa, M.E., Melnick,  
649 A. and Mason, C.E. (2012) methylKit: a comprehensive R package for the analysis of  
650 genome-wide DNA methylation profiles. *Genome Biology*, **13**, R87.
- 651 52. Tang, Y., Horikoshi, M. and Li, W. (2016) ggfortify: unified interface to visualize  
652 statistical result of popular R packages. *The R Journal*, **8**, 478-489.
- 653 53. Smit, A.F.A. and Hubley, R. (2008-2015) RepeatModeler Open-1.0.
- 654 54. Smit, A.F.A., Hubley, R. and Green, P. (2013-2015).
- 655 55. Li, H. (2018) Minimap2: pairwise alignment for nucleotide sequences. *Bioinformatics*,  
656 **34**, 3094-3100.
- 657 56. Ladjali-Mohammed, K., Bitgood, J.J., Tixier-Boichard, M. and Ponce de Leon, F.A.  
658 (1999) International System for Standardized Avian Karyotypes (ISSAK):  
659 standardized banded karyotypes of the domestic fowl (*Gallus domesticus*).  
660 *Cytogenetic and Genome Research*, **86**, 271-276.
- 661 57. Sun, D., Maney, D.L., Layman, T.S., Chatterjee, P. and Yi, S.V. (2019) Regional  
662 epigenetic differentiation of the Z Chromosome between sexes in a female  
663 heterogametic system. *Genome Research*.



- 664 58. Laine, V.N., Gossmann, T.I., Schachtschneider, K.M., Garroway, C.J., Madsen, O.,  
665 Verhoeven, K.J., de Jager, V., Megens, H.J., Warren, W.C., Minx, P. *et al.* (2016)  
666 Evolutionary signals of selection on cognition from the great tit genome and  
667 methylome. *Nat Commun*, **7**, 10474.
- 668 59. Mendizabal, I. and Yi, S.V. (2016) Whole-genome bisulfite sequencing maps from  
669 multiple human tissues reveal novel CpG islands associated with tissue-specific  
670 regulation. *Hum Mol Genet*, **25**, 69-82.
- 671 60. Murrell, A., Heeson, S. and Reik, W. (2004) Interaction between differentially  
672 methylated regions partitions the imprinted genes *Igf2* and *H19* into parent-specific  
673 chromatin loops. *Nature Genetics*, **36**, 889-893.
- 674 61. Hon, G.C., Rajagopal, N., Shen, Y., McCleary, D.F., Yue, F., Dang, M.D. and Ren, B.  
675 (2013) Epigenetic memory at embryonic enhancers identified in DNA methylation  
676 maps from adult mouse tissues. *Nat Genet*, **45**, 1198-1206.
- 677 62. Heyn, H., Vidal, E., Ferreira, H.J., Vizoso, M., Sayols, S., Gomez, A., Moran, S.,  
678 Boque-Sastre, R., Guil, S., Martinez-Cardus, A. *et al.* (2016) Epigenomic analysis  
679 detects aberrant super-enhancer DNA methylation in human cancer. *Genome*  
680 *Biology*, **17**, 11.
- 681 63. Stadler, M.B., Murr, R., Burger, L., Ivanek, R., Lienert, F., Scholer, A., Wirbelauer, C.,  
682 Oakeley, E.J., Gaidatzis, D., Tiwari, V.K. *et al.* (2011) DNA-binding factors shape the  
683 mouse methylome at distal regulatory regions. *Nature*, **480**, 490-495.
- 684 64. Guo, H., Hu, B., Yan, L., Yong, J., Wu, Y., Gao, Y., Guo, F., Hou, Y., Fan, X., Dong,  
685 J. *et al.* (2017) DNA methylation and chromatin accessibility profiling of mouse and  
686 human fetal germ cells. *Cell Research*, **27**, 165-183.
- 687 65. Lorincz, M.C., Dickerson, D.R., Schmitt, M. and Groudine, M. (2004) Intragenic DNA  
688 methylation alters chromatin structure and elongation efficiency in mammalian cells.  
689 *Nat Struct Mol Biol*, **11**, 1068-1075.
- 690 66. Liu, G., Wang, W., Hu, S., Wang, X. and Zhang, Y. (2018) Inherited DNA methylation  
691 primes the establishment of accessible chromatin during genome activation. *Genome*  
692 *Research*, **28**, 998-1007.
- 693 67. Lin, X., Su, J., Chen, K., Rodriguez, B. and Li, W. (2017) Sparse conserved under-  
694 methylated CpGs are associated with high-order chromatin structure. *Genome*  
695 *Biology*, **18**, 163.
- 696 68. Day, K., Waite, L.L., Thalacker-Mercer, A., West, A., Bamman, M.M., Brooks, J.D.,  
697 Myers, R.M. and Absher, D. (2013) Differential DNA methylation with age displays  
698 both common and dynamic features across human tissues that are influenced by  
699 CpG landscape. *Genome Biology*, **14**, R102.
- 700 69. Kim, S., Wyckoff, J., Morris, A.T., Succop, A., Avery, A., Duncan, G.E. and  
701 Jazwinski, S.M. (2018) DNA methylation associated with healthy aging of elderly  
702 twins. *Geroscience*, **40**, 469-484.
- 703 70. Li, G., Zhang, W., Baker, M.S., Laritsky, E., Mattan-Hung, N., Yu, D., Kunde-  
704 Ramamoorthy, G., Simerly, R.B., Chen, R., Shen, L. *et al.* (2014) Major epigenetic  
705 development distinguishing neuronal and non-neuronal cells occurs postnatally in the  
706 murine hypothalamus. *Hum Mol Genet*, **23**, 1579-1590.
- 707 71. Murao, N., Noguchi, H. and Nakashima, K. (2016) Epigenetic regulation of neural  
708 stem cell property from embryo to adult. *Neuroepigenetics*, **5**, 1-10.
- 709 72. Wu, H., Coskun, V., Tao, J., Xie, W., Ge, W., Yoshikawa, K., Li, E., Zhang, Y. and  
710 Sun, Y.E. (2010) *Dnmt3a*-dependent nonpromoter DNA methylation facilitates  
711 transcription of neurogenic genes. *Science*, **329**, 444-448.
- 712 73. Fan, G., Martinowich, K., Chin, M.H., He, F., Fouse, S.D., Hutnick, L., Hattori, D., Ge,  
713 W., Shen, Y., Wu, H. *et al.* (2005) DNA methylation controls the timing of  
714 astroglialogenesis through regulation of JAK-STAT signaling. *Development*, **132**, 3345.

- 715 74. Yi, S.V. (2017) Insights into epigenome evolution from animal and plant methylomes.  
716 *Genome Biology and Evolution*, **9**, 3189-3201.
- 717 75. Keller, T.E., Lasky, J.R. and Yi, S.V. (2016) The multivariate association between  
718 genomewide DNA methylation and climate across the range of *Arabidopsis thaliana*.  
719 *Mol Ecol*, **25**, 1823-1837.
- 720 76. Eichten, S.R., Briskine, R., Song, J., Li, Q., Swanson-Wagner, R., Hermanson, P.J.,  
721 Waters, A.J., Starr, E., West, P.T., Tiffin, P. *et al.* (2013) Epigenetic and Genetic  
722 Influences on DNA Methylation Variation in Maize Populations. *The Plant Cell*, **25**,  
723 2783-2797.
- 724 77. McClay, J.L., Shabalín, A.A., Dozmorov, M.G., Adkins, D.E., Kumar, G., Nerella, S.,  
725 Clark, S.L., Bergen, S.E., Hultman, C.M., Magnusson, P.K.E. *et al.* (2015) High  
726 density methylation QTL analysis in human blood via next-generation sequencing of  
727 the methylated genomic DNA fraction. *Genome Biology*, **16**, 291.
- 728 78. Bell, C.G., Wilson, G.A., Butcher, L.M., Roos, C., Walter, L. and Beck, S. (2012)  
729 Human-specific CpG "beacons" identify loci associated with human-specific traits  
730 and disease. *Epigenetics*, **7**, 1188-1199.
- 731 79. Jeong, H., Mendizabal, I., Berto, S., Usui, N., Toriumi, K., Chatterjee, P., Douglas,  
732 C., Singh, D., Huh, I., Layman, T.S. *et al.* (2020) Distinctive cell-type and context  
733 specific DNA methylation trajectory during human brain evolution. *bioRxiv*.
- 734 80. Cuozzo, C., Porcellini, A., Angrisano, T., Morano, A., Lee, B., Di Pardo, A., Messina,  
735 S., Iuliano, R., Fusco, A., Santillo, M.R. *et al.* (2007) DNA damage, homology-  
736 directed repair, and DNA methylation. *PLoS Genet*, **3**, e110.
- 737 81. O'Hagan, H.M., Mohammad, H.P. and Baylin, S.B. (2008) Double strand breaks can  
738 initiate gene silencing and SIRT1-dependent onset of DNA methylation in an  
739 exogenous promoter CpG island. *PLOS Genetics*, **4**, e1000155.
- 740 82. Morano, A., Angrisano, T., Russo, G., Landi, R., Pezone, A., Bartollino, S.,  
741 Zuchegna, C., Babbio, F., Bonapace, I.M., Allen, B. *et al.* (2014) Targeted DNA  
742 methylation by homology-directed repair in mammalian cells. Transcription reshapes  
743 methylation on the repaired gene. *Nucleic Acids Res*, **42**, 804-821.
- 744 83. Sigurdsson, M.I., Smith, A.V., Bjornsson, H.T. and Jonsson, J.J. (2009) HapMap  
745 methylation-associated SNPs, markers of germline DNA methylation, positively  
746 correlate with regional levels of human meiotic recombination. *Genome Res*, **19**,  
747 581-589.
- 748 84. Zeng, J. and Yi, S.V. (2014) Specific Modifications of Histone Tails, but Not DNA  
749 Methylation, Mirror the Temporal Variation of Mammalian Recombination Hotspots.  
750 *Genome Biology and Evolution*, **6**, 2918-2929.
- 751 85. Rodríguez-Paredes, M. and Esteller, M. (2011) Cancer epigenetics reaches  
752 mainstream oncology. *Nature Medicine*, **17**, 330.
- 753 86. Howard, G., Eiges, R., Gaudet, F., Jaenisch, R. and Eden, A. (2007) Activation and  
754 transposition of endogenous retroviral elements in hypomethylation induced tumors  
755 in mice. *Oncogene*, **27**, 404.
- 756 87. Gaudet, F., Hodgson, J.G., Eden, A., Jackson-Grusby, L., Dausman, J., Gray, J.W.,  
757 Leonhardt, H. and Jaenisch, R. (2003) Induction of tumors in mice by genomic  
758 hypomethylation. *Science*, **300**, 489.
- 759 88. Zhou, Q., Ellison, C.E., Kaiser, V.B., Alekseyenko, A.A., Gorchakov, A.A. and  
760 Bachrog, D. (2013) The epigenome of evolving *Drosophila* neo-sex chromosomes:  
761 dosage compensation and heterochromatin formation. *PLoS Biol*, **11**, e1001711.
- 762 89. Liu, C., Wang, M., Wei, X., Wu, L., Xu, J., Dai, X., Xia, J., Cheng, M., Yuan, Y.,  
763 Zhang, P. *et al.* (2019) An ATAC-seq atlas of chromatin accessibility in mouse  
764 tissues. *Scientific Data*, **6**, 65.
- 765

766 **Figure 1**

767

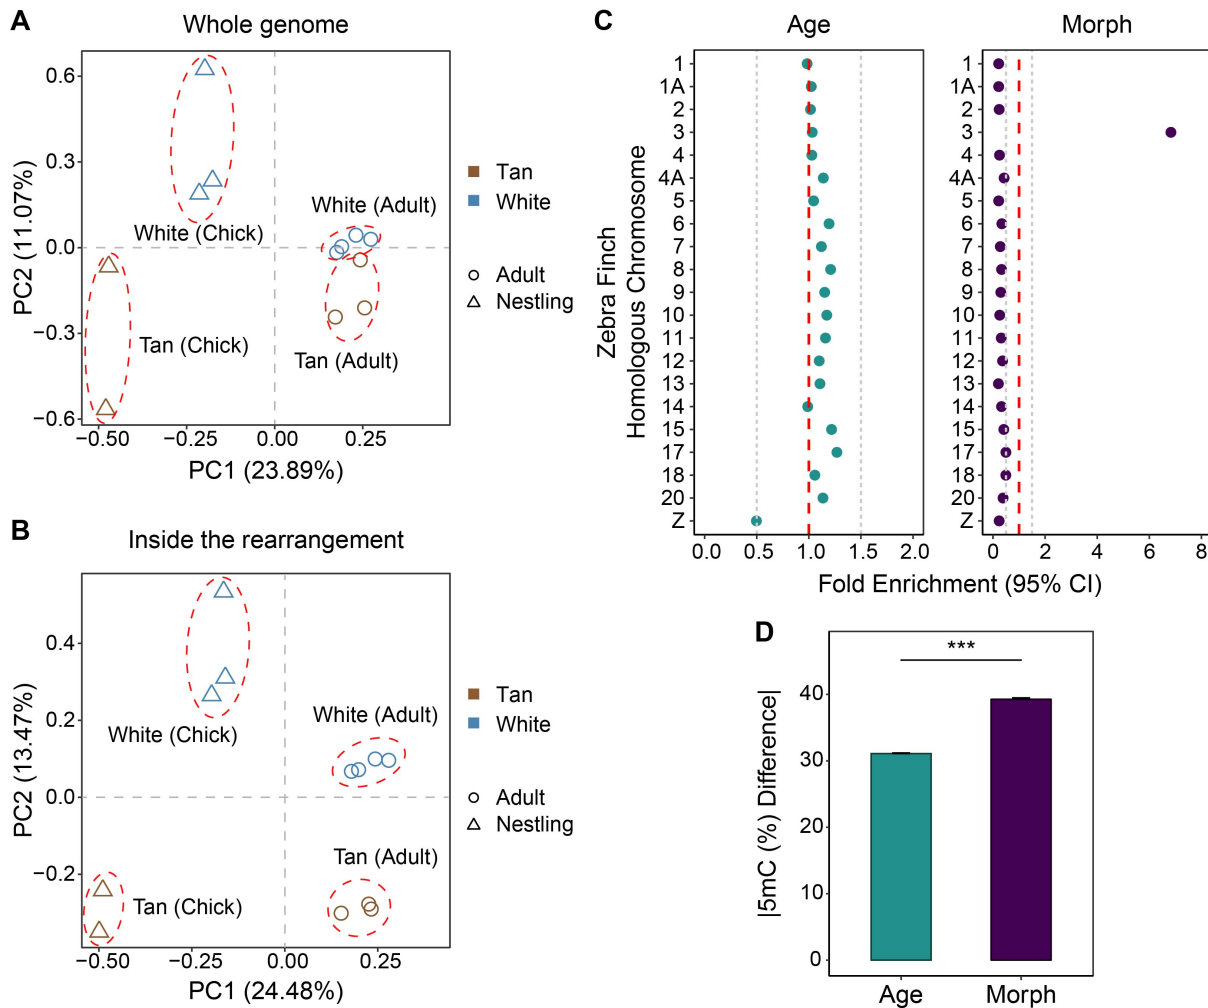

768

769

770 **Figure 1. The effects of age and morph on DNA methylation patterns.** PCA of WGBS  
 771 samples for **(A)** all CpGs and **(B)** CpGs within the rearranged portion on ZAL2/ZAL2<sup>m</sup>. **(C)**  
 772 Fold enrichment with 95% confidence interval (95% CI) for the chromosomal distribution of  
 773 DMCs (using homologous chromosomes in zebra finch for designation). The fold enrichment  
 774 and confidence intervals were calculated by comparing the real distribution of DMCs with the  
 775 null distribution generated by 100 random selections of the same number of CpGs. The red  
 776 dashed lines indicate no depletion/enrichment (enrichment score = 1) of DMCs on a  
 777 chromosome, and the gray dashed lines depict boundaries for moderate depletion (0.5) or  
 778 enrichment (1.5) of DMCs. Only chromosomes larger than 10 Mb are shown. **(D)** Mean  
 779 absolute differences (with 95% confidence intervals) in fractional DNA methylation (5mC  
 780 [%]) for age-DMCs and morph-DMCs. Effect sizes were smaller for age-DMCs than for  
 781 morph-DMCs. \*\*\**P* < 0.001; Mann-Whitney *U* test. Standard error bars are shown.  
 782

783 **Figure 2**

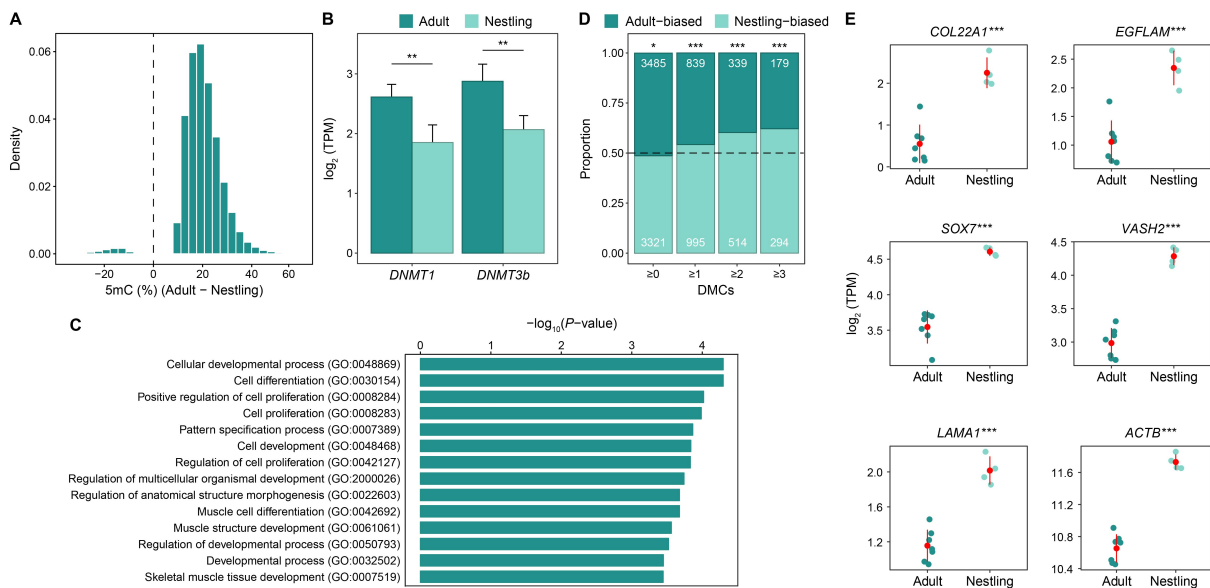

784

785

786 **Figure 2. Hypermethylation in adults relative to nestlings.** (A) The density distribution of  
 787 differences in methylation between adults and nestlings shows that most age-DMCs are  
 788 hypermethylated in adults, compared with nestlings. (B) Both *DNMT1* and *DNMT3b* were  
 789 more highly expressed in adults than in nestlings (tested by DESeq2, \*\*\*: $P < 0.001$ ),  
 790 consistent with the observed hypermethylation in adults. (C) The proportions of adult-biased  
 791 and nestling-biased genes with more than 1, 2, or 3 age-DMCs in their promoters. The  
 792 numbers of DE genes that are biased in each age group are marked. The differences in the  
 793 number of DE genes between adults and nestlings were tested by a binomial test (\*\*\*: $P <$   
 794  $0.001$ ). (D) GO enrichment of genes that contain at least three age-DMCs within their  
 795 promoters (defined as within 1.5 Kb upstream of TSS). A statistical overrepresentation test  
 796 was performed by PANTHER14.1 (Fisher's exact test), with all white-throated sparrow  
 797 genes present in the *Gallus gallus* annotation database as the reference list. Only GO terms  
 798 with FDR-adjusted  $Q < 0.05$  and fold enrichment  $> 1.5$  are reported. (E) Adults in general  
 799 have lower gene expression levels than nestlings for age-DE genes (tested by DESeq2,  
 800 \*\*\*: $P < 0.001$ ) associated with developmental processes (GO:0032502) and which have at  
 801 least three age-DMCs in the promoters. Shown here are some examples. Each dot  
 802 represents a sample with both WGBS and RNA-seq data. Mean  $\pm$  standard deviations are  
 803 depicted as red lines.

804 **Figure 3**

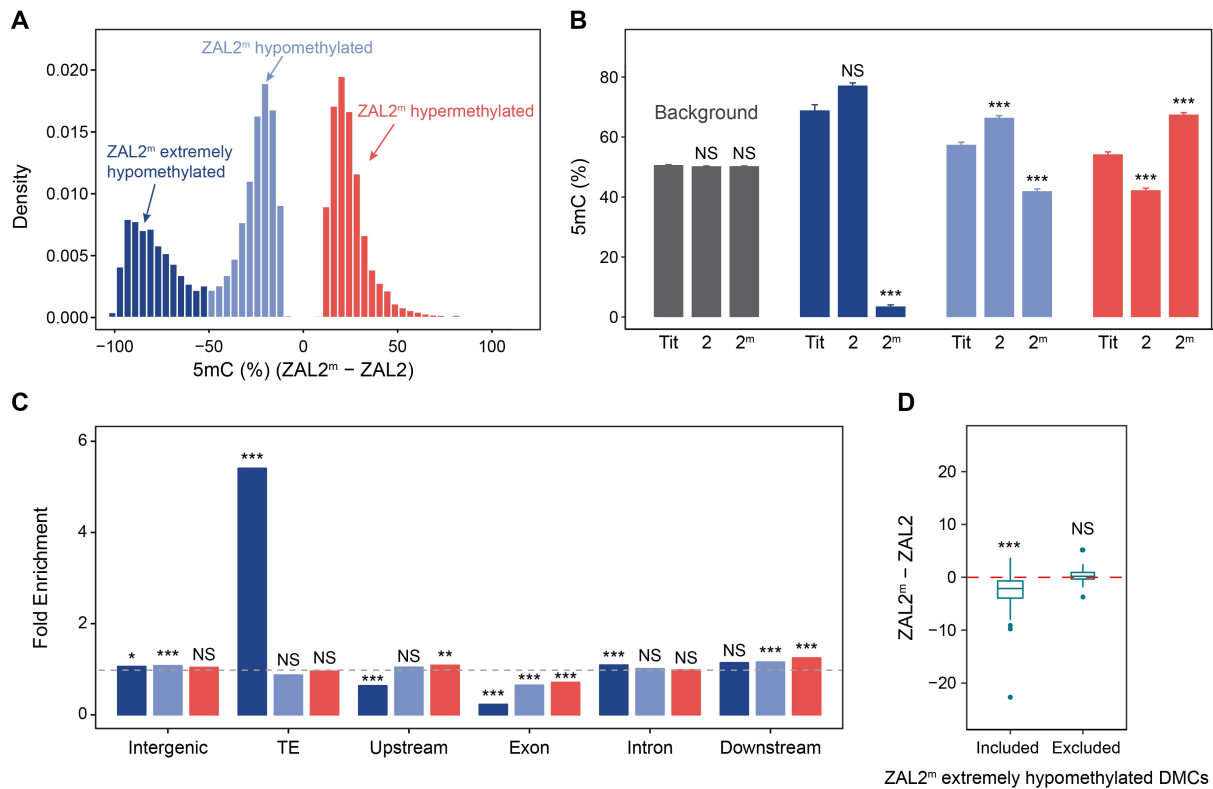

805  
806

807

808 **Figure 3. Characterization of the three classes of allele-DMCs.** (A) The effect sizes of the differences in DNA methylation between ZAL2 and ZAL2<sup>m</sup> alleles (allele-DMCs) fall into three distinct groups. (B) Changes in DNA methylation levels relative to the ancestral methylation levels inferred by comparison with an outgroup species, great tit. \*\*\*  $P < 0.001$ , Mann-Whitney  $U$  test. (C) Fold enrichment of allele-DMCs within different genomic regions relative to the background (all CpGs on ZAL2/ZAL2<sup>m</sup>). The dashed line corresponds to a fold enrichment of 1 (no enrichment or depletion). Intergenic regions were defined as regions that were at least 10 Kb away from any genes, and upstream/downstream distal regions were defined as 10 Kb upstream/downstream of the transcription start site (TSS)/transcription end site (TES). For B-C, all ZAL2/ZAL2<sup>m</sup>-linked CpGs were used as the control, and enrichment or depletion was assessed by a two proportion Z-test. (D) Differences in TE methylation (5mC %) between ZAL2<sup>m</sup> and ZAL2 after including or excluding the ZAL2<sup>m</sup> extremely hypomethylated DMCs. Only TE families with more than 10 CpGs were used for analysis. For B-D, NS: not significant; \* $P < 0.05$ ; \*\* $P < 0.01$ ; \*\*\* $P < 0.001$ , Mann-Whitney  $U$  test.

822  
823

824 **Figure 4**

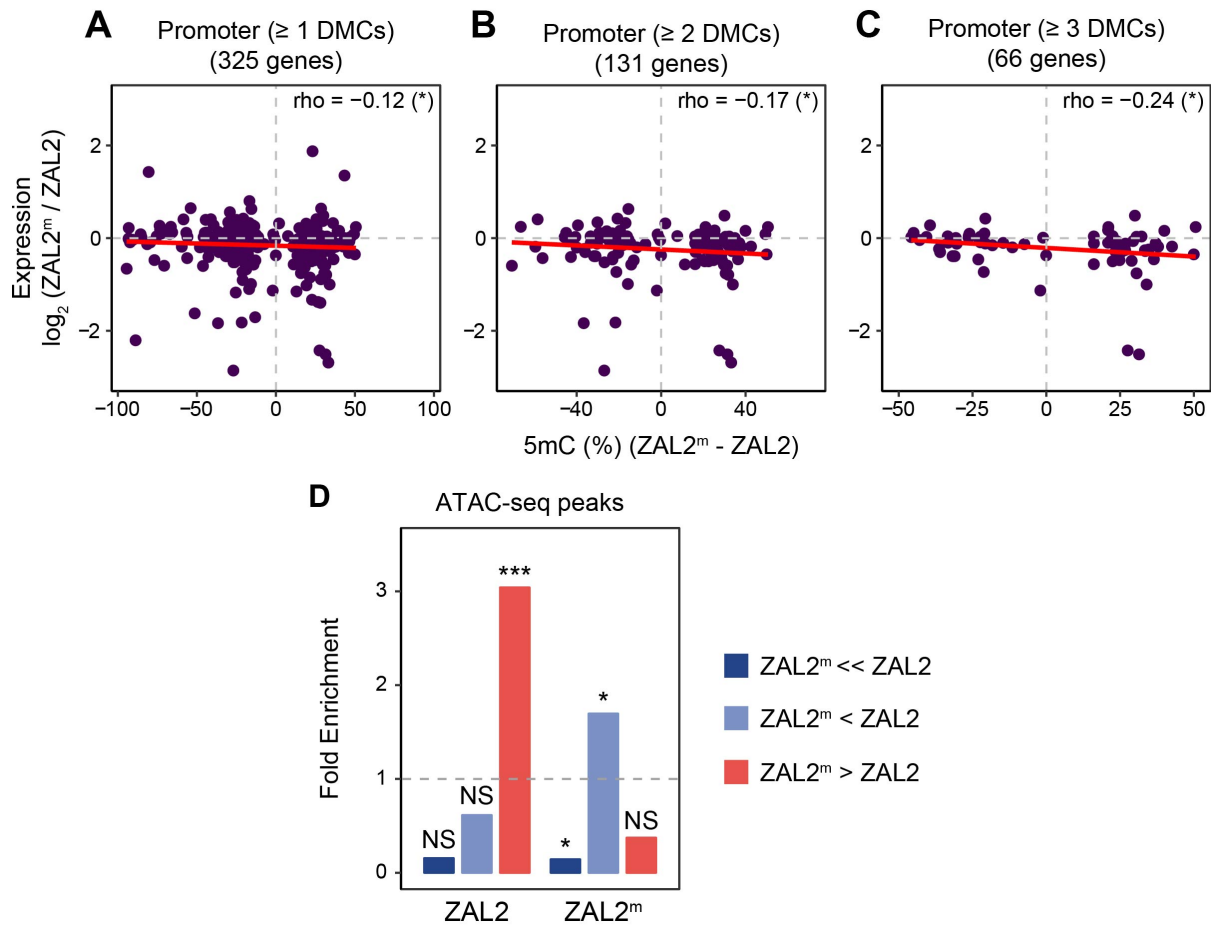

825

826

827

828 **Figure 4. The potential role of allelic differences in DNA methylation in differential**  
829 **gene regulation. (A-C)** Relationships between allelic differences in DNA methylation and  
830 allelic differences in gene expression for genes harboring more than 1, 2, and 3 allele-DMCs  
831 in their promoters. Allelic differences in DNA methylation across DMCs in a region were  
832 averaged. The strength and direction of association were measured by Spearman's rank  
833 correlation coefficient, and the relationship was fit with a linear regression line (in red). **(D)**  
834 Fold enrichment of allele-DMCs occurring within ZAL2 or ZAL2<sup>m</sup>-specific ATAC-seq peaks.  
835 The dashed line corresponds to a fold enrichment of 1 (no enrichment or depletion relative to  
836 the background of all ZAL2/ZAL2<sup>m</sup> CpGs). NS: not significant; \* $P < 0.05$ ; \*\*\* $P < 0.001$ . Two  
837 proportion Z-test (also in Supplementary Table 2).  
838
